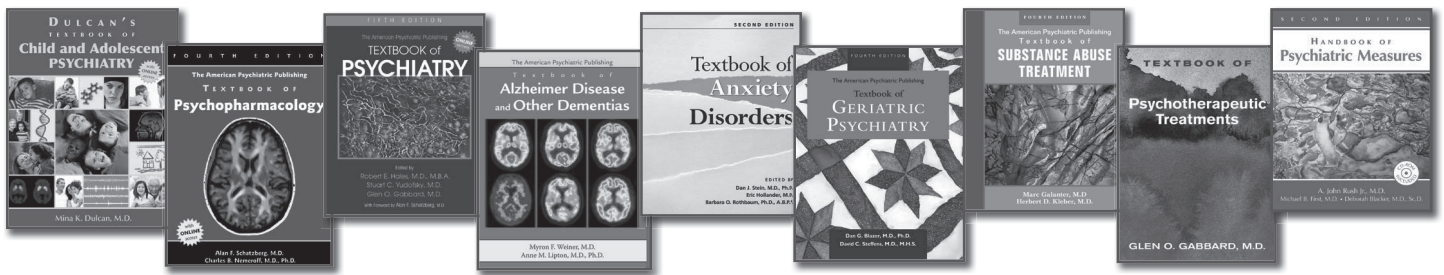

# Essential TEXTBOOKS in PSYCHIATRY

## Dulcan's Textbook of Child and Adolescent Psychiatry

Edited by Mina K. Dulcan, M.D.

2010 • 1104 pages • ISBN 978-1-58562-323-5  
Hardcover • \$239.00 • Item #62323

## The American Psychiatric Publishing Textbook of Psychopharmacology, Fourth Edition

Edited by Alan F. Schatzberg, M.D., and Charles B. Nemeroff, M.D., Ph.D.

2009 • 1648 pages • ISBN 978-1-58562-309-9  
Hardcover • \$285.00 • Item #62309

## The American Psychiatric Publishing Textbook of Psychiatry, Fifth Edition

Edited by Robert E. Hales, M.D., M.B.A., Stuart C. Yudofsky, M.D., and Glen O. Gabbard, M.D.

With Foreword by Alan F. Schatzberg, M.D.

2008 • 1818 pages • ISBN 978-1-58562-257-3  
Hardcover • \$290.00 • Item #62257

## The American Psychiatric Publishing Textbook of Alzheimer Disease and Other Dementias

Edited by Myron F. Weiner, M.D., and Anne M. Lipton, M.D., Ph.D.

2009 • 575 pages • ISBN 978-1-58562-278-8  
Hardcover • \$135.00 • Item #62278

## Textbook of Anxiety Disorders, Second Edition

Edited by Dan J. Stein, M.D., Ph.D., Eric Hollander, M.D., and Barbara O. Rothbaum, Ph.D., A.B.P.P.

2010 • 822 pages • ISBN 978-1-58562-254-2  
Hardcover • \$125.00 • Item #62254

## The American Psychiatric Publishing Textbook of Substance Abuse Treatment, Fourth Edition

Edited by Marc Galanter, M.D., and Herbert D. Kleber, M.D.

2008 • 770 pages • ISBN 978-1-58562-276-4  
Hardcover • \$175.00 • Item #62276

## The American Psychiatric Publishing Textbook of Geriatric Psychiatry, Fourth Edition

Edited by Dan G. Blazer, M.D., Ph.D., and David C. Steffens, M.D., M.H.S.

2009 • 694 pages • ISBN 978-1-58562-277-1  
Hardcover • \$164.00 • Item #62277

## Textbook of Psychotherapeutic Treatments

Edited by Glen O. Gabbard, M.D.

2009 • 896 pages • ISBN 978-1-58562-304-4  
Hardcover • \$99.00 • Item #62304

CD-ROM Included!

## Handbook of Psychiatric Measures, Second Edition

Edited by A. John Rush Jr., M.D., Michael B. First, M.D., and Deborah Blacker, M.D., Sc.D.

2008 • 864 pages • ISBN 978-1-58562-218-4  
Hardcover • \$205.00 • Item #62218

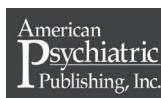

The First and Last Word in Psychiatry

Order Online: [www.appi.org](http://www.appi.org) • Phone: 1-800-368-5777 • Fax: 703-907-1091 • Email: [appi@psych.org](mailto:appi@psych.org)

Priority Code AH1001

Find us on Facebook and Twitter

# PsychiatryOnline.com

**Online access to a premier collection of psychiatric resources**

PsychiatryOnline.com is a powerful website that features *DSM-IV-TR*<sup>®</sup> and *The American Journal of Psychiatry* as the cornerstones of an unsurpassed collection of psychiatric references, including books, journals, and self-assessment tools. Much more than simply books and journals presented online, **PsychiatryOnline.com** features sophisticated searching and indexing tools that enable you to quickly target all the information you need.

Whether your needs are clinical, learning, or research, **PsychiatryOnline.com** provides access to the information critical to your work and everyday practice with convenient features such as:

- Search and linking tools that let you find relevant book chapters and journal articles quickly.
- Unlimited downloads to PDA so you can take book sections with you wherever you go.
- Copy and paste functions for easy creation of tables and presentations.
- Citation exports to most reference manager formats.
- Printer-friendly views that mean no reformatting when you need a hard copy.
- Saved searches and bookmarked chapters to make it easy to return to topics of interest.
- Email page feature that allows you to share the information with colleagues.

**Subscribe TODAY, visit  
www.PsychiatryOnline.com**

Interested in an institutional subscription?  
Please contact us at [institutions@psych.org](mailto:institutions@psych.org)  
or call 1-800-368-5777 ext. 8538  
or 703-907-8538  
for more information and a subscription  
rate quote.

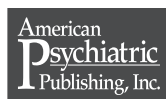

The First and Last Word in Psychiatry

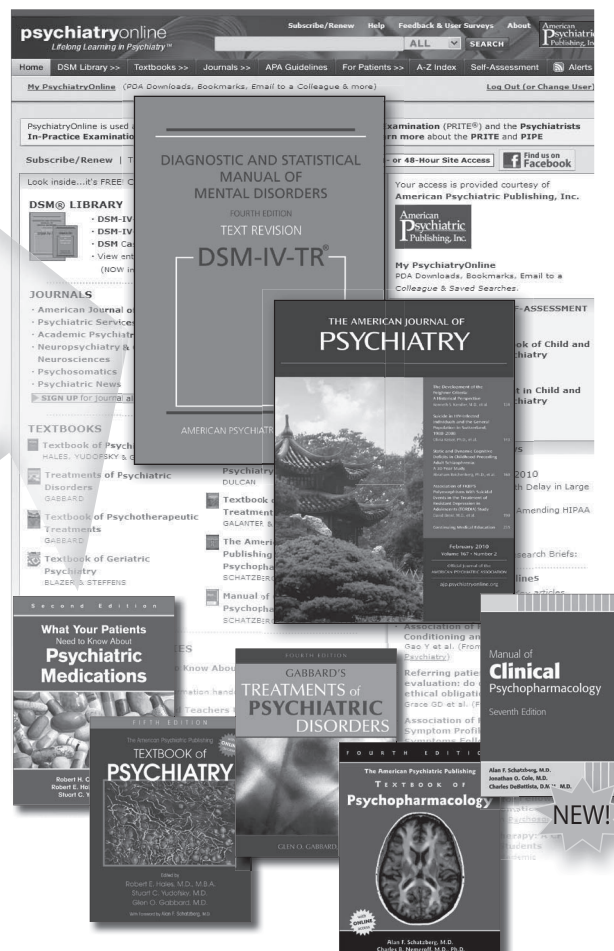

## Other subscriber benefits include:

- Book of the Month —You'll get access each month to a FREE PDF version of a featured book from American Psychiatric Publishing, Inc.
- The most up-to-date versions available including NEW *American Psychiatric Association Practice Guidelines* as they are released.
- PLUS Guideline Watches and DSM-IV-TR Coding Updates, as soon as they are available.
- American Psychiatric Association Members receive \$110 **discount** off a regular priced subscription. APA Members-in-Training (MITs) can save even more!

Please enter priority code AH1029 when completing your request.

Find us on [facebook](#) and [twitter](#).
