*Personality and Temperament*

**FOCUS** THE JOURNAL OF LIFELONG LEARNING IN PSYCHIATRY

Spring 2010, Volume VIII, Number 2

# FOCUS

THE JOURNAL OF LIFELONG LEARNING IN PSYCHIATRY

## *Personality and Temperament: New and Alternative Perspectives*

*Guest Editor, C. Robert Cloninger, M.D.*

### IN CLINICAL SYNTHESIS:

Promotion of Well-Being in Person-Centered  
Mental Health Care

*C. Robert Cloninger, M.D.*

*Ada H. Zohar, Ph.D.*

*Kevin M. Cloninger, Ph.D.*

Nature and Nurture in Personality

*Liisa Keltikangas-Järvinen, Ph.D.*

*Markus Jokela, Ph.D.*

The Temperament and Character Inventory  
in Addiction Treatment

*Daniel H. Angres, M.D.*

A Person-Centered Approach  
to Clinical Practice

*Kathleen M. Wong, M.D.*

*C. Robert Cloninger, M.D.*

AND INFLUENTIAL PUBLICATIONS . . .
